# Supplementary material for: Differential impact of malaria control interventions on P. falciparum and P. vivax infections in young Papua New Guinean children
Source: BMC Med. 2019 Dec 9;17:220. doi: 10.1186/s12916-019-1456-9 (PMC6900859; doi:10.1186/s12916-019-1456-9)
Supplement: Supplementary file 1 — Additional file 1: Table S1. Bivariate associations between risk factors and the prevalence, molFOB and clinical incidence. Estimates of bivariate associations calculated via generalised estimating equation (GEE) models for prevalence and molecular force of blood-stage (molFOB) infections and negative binomial regression model used for clinical malaria episodes. Recent antimalarial use was not tested in the model for clinical malaria episodes due to aggregated clinical data. aAge in years at enrolment was used for clinical malaria incidence while at the start of interval was used for molFOB. bComparison group; For multilevel variables, comparison group estimates are presented as odds or incidence rate. PCR: Polymerase chain reaction assay; LM: light microscopy; OR: odds ratio; CI95: 95% confidence interval; IRR: incidence rate ratio. [file 12916_2019_1456_MOESM1_ESM.xls]

## Sheet: Sheet1
Table S1 Bivariate asociations between the risk factors and the prevalence, clinical incidence and molecular force of blood-stage infections
	Prevalence								Clinical incidence				molFOB
	P. falciparum				P. vivax				P. falciparum		P. vivax		P. falciparum		P. vivax
	PCR		LM		PCR		LM
	OR/Odds [CI95]	p-value	OR/Odds [CI95]	p-value	OR/Odds [CI95]	p-value	OR/Odds [CI95]	p-value	IRR/IR [CI95]	p-value	IRR/IR [CI95]	p-value	IRR/IR [CI95]	p-value	IRR/IR [CI95]	p-value
Covariates
Areas of residence
bIlahita 1,2,3,4,6,7	0.05 [0.04 - 0.06]	<0.001	0.01 [0.005 - 0.015]	<0.001	0.07 [0.04 - 0.10]	<0.001	0.03 [0.02 - 0.05]	<0.001	0.05 [0.02 - 0.11]	<0.001	0.06 [0.03 - 0.13]	<0.001	1.09 [0.78 - 1.53]	0.622	0.65 [0.44 - 0.96]	0.03
Balanga & Balif	1.04 [0.59 - 1.85]	0.885	1.46 [0.33 - 6.48]	0.618	0.99 [0.52 - 1.88]	0.983	0.61 [ 0.25 - 1.50]	0.284	0.56 [0.11 - 2.77]	0.476	0.96 [0.27 - 3.41]	0.946	1.15 [0.66 - 2.00]	0.618	1.45 [0.79 - 2.65]	0.234
Kamanokor & Ilahita 5	3.04 [1.87 - 4.92]	<0.001	5.75 [2.56 - 12.9]	<0.001	9.36 [5.54 - 15.8]	<0.001	12.0 [6.03 - 23.9]	<0.001	5.03 [1.86 - 13.6]	0.001	8.73 [3.44 - 22.2]	<0.001	1.67 [0.97 - 2.87]	0.062	7.46 [4.67 - 11.9]	<0.001
Sunuhu 1&2	8.49 [6.14 - 11.8]	<0.001	19.7 [10.6 - 36.8]	<0.001	12.6 [8.11 - 19.6]	<0.001	11.7 [6.23 - 21.9]	<0.001	9.59 [4.05 - 22.7]	<0.001	5.53 [2.25 - 13.6]	<0.001	3.28 [2.21 - 4.85]	<0.001	8.29 [5.35 - 12.8]	<0.001
	Overall p<0.0001		Overall p<0.0001		Overall p<0.0001		Overall p<0.0001		Overall p<0.0001		Overall p<0.0001		Overall p<0.0001		Overall p<0.0001
Age in years (linear)	1.24 [1.09 - 1.41]	0.001	1.13 [0.94 - 1.36]	0.183	1.11 [0.98 - 1.26]	0.109	0.96 [0.84 - 1.10]	0.554	1.27 [1.01 - 1.59]	0.044	1.01 [0.78 - 1.32]	0.925	1.21 [1.07 - 1.36]	0.003	1.22 [1.08 - 1.38]	0.001
Haemoglobin level	0.72 [0.64 - 0.80]	<0.001	0.45 [0.38 - 0.54]	<0.001	0.98 [0.90 - 1.07]	0.655	0.94 [0.83 - 1.07]	0.331	0.38 [0.26 - 0.55]	<0.001	0.27 [0.17 - 0.43]	<0.001	0.96 [0.83 - 1.11]	0.571	0.86 [0.77 - 0.96]	0.008
Haemoglobin categories
b≥0 grams/dL	0.10 [0.08 - 0.12]	<0.001	0.02 [0.01 - 0.03]	<0.001	0.25 [0.20 - 0.30]	<0.001	0.11 [0.09 - 0.14]	<0.001	0.16 [0.10 - 0.26]	<0.001	0.10 [0.06 - 0.19]	<0.001	1.60 [1.22 - 2.10]	0.001	2.15 [1.73 - 2.67]	<0.001
9 – 9.9 grams/dL	1.29 [1.04 - 1.60]	0.022	2.02 [1.36 - 3.00]	<0.001	0.99 [0.86 - 1.13]	0.832	1.00 [0.81 - 1.23]	0.975	1.09 [0.58 - 2.07]	0.782	1.84 [0.83 - 4.07]	0.132	1.18 [0.83 - 1.67]	0.359	1.15 [0.95 - 1.41]	0.159
≤ 9 grams/dL	2.11 [1.64 - 2.72]	<0.001	5.70 [3.54 - 9.19]	<0.001	1.18 [0.96 - 1.44]	0.114	1.29 [1.05 - 1.84]	0.023	1.48 [0.73 - 3.01]	0.278	3.63 [1.58 - 8.33]	0.002	1.29 [0.85 - 1.95]	0.229	1.33 [1.00 - 1.78]	0.048
	Overall p<0.0001		Overall p<0.0001		Overall p=0.1777		Overall p=0.0344		Overall p=0.5469		Overall p=0.0093		Overall p=0.4532		Overall p=0.1244
Active detection of infection (ADI) timepoint									Cannot be tested due to aggregated data
bEnrolment	0.23 [0.18 - 0.29]	<0.001	0.12 [0.08 - 0.16]	<0.001	0.30 [0.24 - 0.38]	<0.001	0.17 [0.13 - 0.22]	<0.001					Not applicable
Week 4 / Interval 1	0.42 [0.31 - 0.57]	<0.001	0.51 [0.34 - 0.75]	0.001	0.89 [0.73 - 1.08]	0.222	1.02 [0.76 - 1.37]	0.88
Week 8 / Interval 2	0.42 [0.31 - 0.58]	<0.001	0.32 [0.19 - 0.53]	<0.001	0.90 [0.74 - 1.10]	0.307	1.05 [0.78 - 1.42]	0.749					0.69 [0.34 - 1.41]	0.309	0.82 [0.56 - 1.20]	0.306
Week 12 / Interval 3	0.33 [0.23 - 0.48]	<0.001	0.19 [0.10 - 0.38]	<0.001	0.78 [0.62 - 0.97]	0.025	0.88 [0.64 - 1.22]	0.458					0.18 [0.07 - 0.46]	<0.001	0.50 [0.34 - 0.73]	<0.001
Week 16 / Interval 4	0.39 [0.27 - 0.56]	<0.001	0.31 [0.18 - 0.53]	<0.001	0.75 [0.60 - 0.93]	0.009	0.71 [0.51 - 0.99]	0.04					0.62 [0.30 - 1.29]	0.202	0.72 [0.49 - 1.05]	0.091
Week 20 / Interval 5	0.46 [0.30 - 0.71]	<0.001	0.25 [0.13 - 0.49]	<0.001	0.82 [0.61 - 1.10]	0.178	0.52 [0.36 - 0.77]	0.001					2.10 [1.08 - 4.07]	0.029	1.13 [0.78 - 1.61]	0.52
Week 24 / Interval 6	0.36 [0.24 - 0.54]	<0.001	0.31 [0.17 - 0.57]	<0.001	0.93 [0.72 - 1.20]	0.569	0.53 [0.35 - 0.81]	0.003					0.96 [0.51 - 1.80]	0.889	0.69 [0.47 - 1.01]	0.057
Week 28 / Interval 7	0.38 [0.26 - 0.57]	<0.001	0.40 [0.24 - 0.69]	0.001	0.78 [0.60 - 1.02]	0.071	0.82 [0.57 - 1.18]	0.295					0.92 [0.48 - 1.78]	0.802	0.62 [0.41 - 0.93]	0.021
Week 32 / Interval 8	0.42 [0.29 - 0.61]	<0.001	0.29 [0.16 - 0.53]	<0.001	0.72 [0.55 - 0.95]	0.018	0.65 [0.43 - 0.96]	0.033					1.04 [0.55 - 1.95]	0.905	0.77 [0.53 - 1.11]	0.165
Week 36 / Interval 9	0.54 [0.38 - 0.76]	<0.001	0.46 [0.28 - 0.75]	0.002	0.72 [0.55 - 0.95]	0.018	0.54 [0.36 - 0.80]	0.002					5.85 [3.54 - 9.68]	<0.001	0.71 [0.47 - 1.07]	0.1
Week 40 / Interval 10	2.10 [1.59 - 2.78]	<0.001	0.77 [0.49 - 1.19]	0.231	0.99 [0.77 - 1.28]	0.954	0.39 [0.25 - 0.60]	<0.001					Overall p<0.0001		Overall p=0.0002
	Overall p<0.0001		Overall p<0.0001		Overall p=0.0713		Overall p<0.0001
Bed net use	0.58 [0.27 - 1.29]	0.182	0.64 [0.13 - 3.06]	0.578	0.80 [0.45 - 1.40]	0.431	1.08 [0.38 - 3.01]	0.898	0.01 [0.00003 - 4.85]	0.148	0.05 [0.00001 - 152.5]	0.459	Data not converging
Febrile illness	2.28 [1.66 - 3.15]	<0.001	4.60 [3.09 - 6.83]	<0.001	1.07 [0.78 - 1.47]	0.663	1.27 [0.83 - 1.95]	0.265	In the definition of clinical episode				1.12 [0.63 - 1.98]	0.693	1.25 [0.85 - 1.82]	0.253
History of febrile illness	2.97 [1.57 - 5.63]	0.001	3.57 [1.42 - 8.99]	0.007	1.68 [1.06 - 2.66]	0.028	1.87 [0.86 - 4.07]	0.116	Cannot be tested due to aggregated data				1.15 [0.20 - 6.46]	0.877	0.94 [0.29 - 3.10]	0.922
Enlarged spleen	2.25 [1.23 - 4.11]	0.009	3.28 [1.55 - 6.93]	0.002	1.82 [1.07 - 3.11]	0.028	2.11 [1.04 - 4.27]	0.038
Recent antimalarial use	1.59 [0.87 - 2.90]	0.133	1.36 [0.47 - 3.98]	0.57	0.36 [0.15 - 0.85]	0.021	0.39 [0.10 - 1.56]	0.181					4.89 [3.05 - 7.84]	<0.001	1.14 [0.49 - 2.63]	0.758
molFOB	Not applicable								1.20 (1.12 - 1.28)	<0.001	1.27 (1.19 - 1.36)	<0.001	Not applicable
Estimates of bivariate associations estimated by GEE for prevalence and molecular force of blood-stage infections (molFOB) and negative binomial regression model used for clinical malaria episodes. Recent antimalarial use was not tested in the model for clinical malaria episodes due to aggregated clinical data. aAge in years at enrolment was used for clinical malaria incidence while at the start …
