# Supplementary material for: Differential impact of malaria control interventions on P. falciparum and P. vivax infections in young Papua New Guinean children
Source: BMC Med. 2019 Dec 9;17:220. doi: 10.1186/s12916-019-1456-9 (PMC6900859; doi:10.1186/s12916-019-1456-9)
Supplement: Supplementary file 2 — Additional file 2: Table S2. Key predictors of the prevalence of infections due to P. falciparum and P. vivax as diagnosed by light microscopy. Multivariate generalised estimating equation (GEE) model-based estimates of the risk of infection detected at each monthly active detection of infection visits via backward selection of significant risk factors. aOverall significance level for the variable estimated using wald chi-squared test. AOR: multivariate adjusted odds ratio. CI95: 95% confidence interval; bExcluding febrile illness at the time of visit; Data for observed positive are %. [file 12916_2019_1456_MOESM2_ESM.xls]

## Sheet: Sheet1
Table S2 Key predictors of the prevalence of infections due to P. falciparum and P. vivax as diagnosed by light microscopy in 2013
	P. falciparum				P. vivax
	Observed positive (%; n=4359)	AOR	CI95	p-value	Observed positive (%; n=4359)	AOR	CI95	p-value
Areas of residence
Ilahita 1-4, 7	0.834327	Reference			2.74136	Reference
Balanga & Balif	1.10553	1.68989	(0.41 - 6.99)	0.469	1.70854	0.771522	(0.30 – 2.01)	0.595
Kamanokor & Ilahita 5	4.72313	4.1402	(1.67 - 10.3)	0.002	25.4072	15.1254	(7.52 – 30.4)	<0.001
Sunuhu 1&2	14.3657	18.0496	(8.94 - 36.4)	<0.001	25	15.978	(8.44 – 30.3)	<0.001
			<0.0001a				<0.0001a
Age		1.48	(1.21 - 1.81)	<0.001		2.59	(1.14 – 1.51)	<0.001
ACD time-points
Enrolment	10.4116	Reference			14.77	Reference
Week 4	5.44554	0.456777	(0.27 - 0.78)	0.004	15.099	0.99	(0.69 - 1.42)	0.949
Week 8	3.62319	0.247884	(0.13 - 0.48)	<0.001	15.2174	1.02	(0.71 - 1.46)	0.925
Week 12	2.20588	0.128203	(0.05 - 0.30)	<0.001	13.2353	0.8	(0.53 - 1.19)	0.269
Week 16	3.41463	0.20527	(0.11 - 0.40)	<0.001	10.4878	0.61	(0.41 - 0.91)	0.016
Week 20	3.0137	0.1694	(0.07 - 0.39)	<0.001	8.49315	0.4	(0.26 - 0.63)	<0.001
Week 24	3.54223	0.204106	(0.10 - 0.43)	<0.001	8.44687	0.4	(0.24 - 0.67)	<0.001
Week 28	4.0107	0.307663	(0.15 - 0.62)	0.001	11.7647	0.68	(0.43 - 1.10)	0.117
Week 32	3.27456	0.194398	(0.09 - 0.42)	<0.001	10.0756	0.49	(0.30 - 0.80)	0.004
Week 36	5	0.381279	(0.20 - 0.74)	0.004	8.5	0.39	(0.24 - 0.62)	<0.001
Week 40	8.10811	0.631005	(0.33 - 1.21)	0.166	6.14251	0.26	(0.15 - 0.44)	<0.001
			p<0.0001a				p<0.0001a
Haemoglobin level		0.49	(0.41 - 0.58)	<0.001
Recent antimalarial use	8.9				8.9	0.29	(0.09 - 0.90)	0.032
Enlarged spleen	22.7				36.4
Febrile illness	18.3	3.29	(2.12 - 5.12)	<0.001	18.8
2 weeks history of febrile illnessb	16.7				26.2
Multivariate GEE model-based estimates of the risk of infection detected at each monthly active detection of infection visits via backward selection of significant risk factors. aOverall significance level for the variable estimated using wald chi-squared test; bExcluding febrile illness at the time of visit; AOR: multivariate adjusted odds ratio; CI95: 95% confidence interval
